# Supplementary material for: Achieving a near-unity quantum yield from yellow emitting metal halide double perovskites toward human-centric warm white LED lighting
Source: Royal Society of Chemistry journal article supplement (doi:10.1039/d1tc06173a), 2022-01-01
Supplement: d1tc06173a1.pdf [file d1tc06173a1.pdf]

# **Achieving near-unity quantum yield of yellow emitting metal halide double perovskites toward human-centric warm white LED lightings**

Guangting Xiong<sup>a</sup>, Yahong Jin<sup>a, \*</sup>, Kaiyuan Deng<sup>a</sup>, Lifang Yuan<sup>a, b</sup>, Haoyi Wu<sup>a</sup>,  
Guifang Ju<sup>a</sup>, Li Chen<sup>a</sup>, and Yihua Hu<sup>a, \*</sup>

<sup>a</sup> School of Physics and Optoelectronic Engineering, Guangdong University of Technology, Waihuan Xi Road, No. 100, Guangzhou 510006, PR China.

<sup>b</sup> Department Experimental Teaching Department, Guangdong University of Technology, Waihuan Xi Road, No. 100, Guangzhou 510006, PR China.

\*Corresponding author. E-mail: yhj@gdut.edu.cn; huyh@gdut.edu.cn

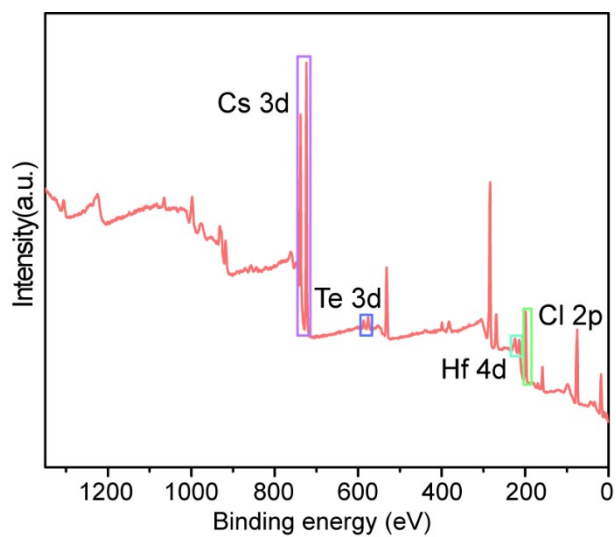

**Figure. S1.** XPS survey spectrum of sample  $\text{Cs}_2\text{HfCl}_6$ : Te.

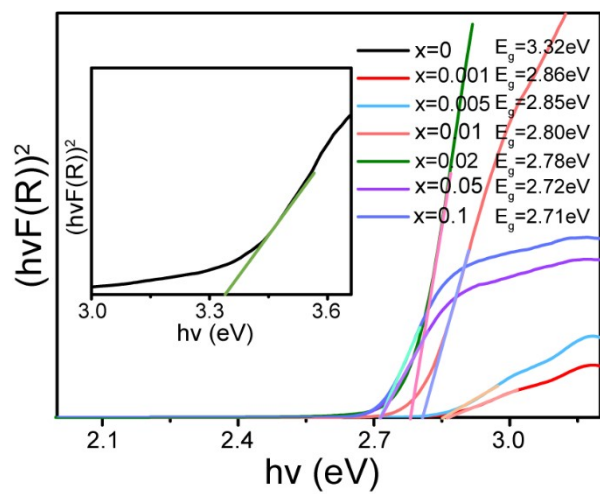

**Figure S2.** the function of  $(hvF(R))^2$  versus  $hv$ .

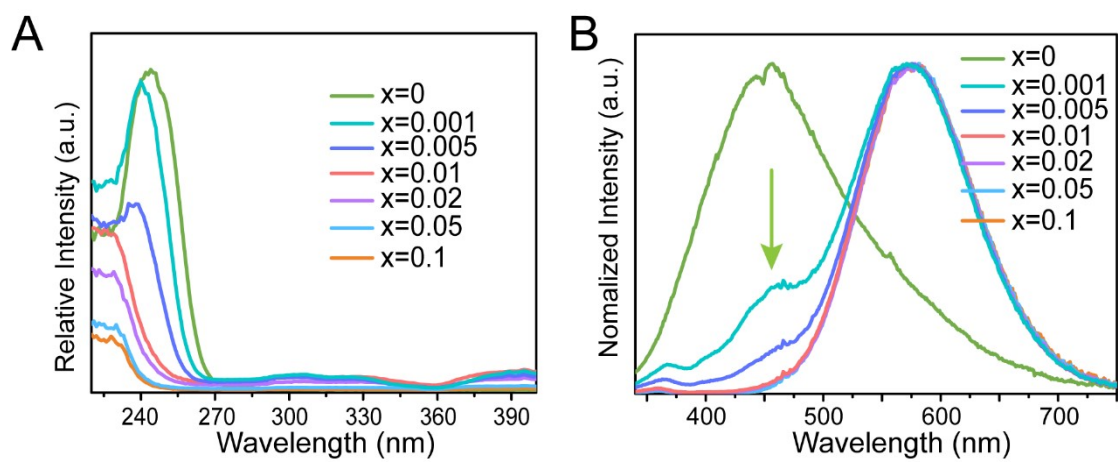

**Figure S3.** (A) Excitation ( $\lambda_{\text{em}}=456$  nm) and (B) emission ( $\lambda_{\text{ex}}=254$  nm) spectra of Cs<sub>2</sub>HfCl<sub>6</sub>: Te.

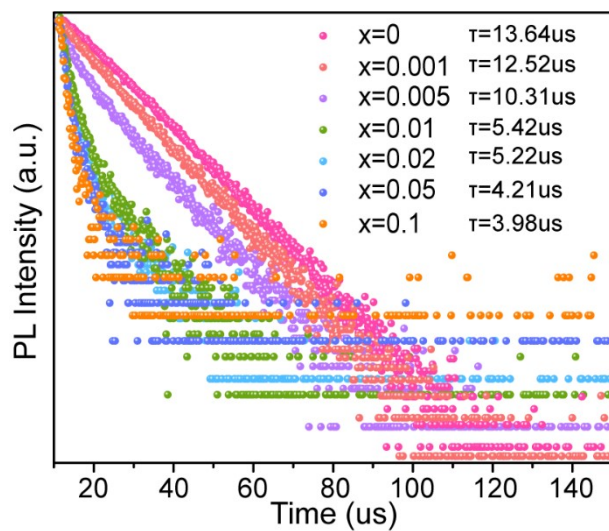

**Figure S4.** Decay curves of Cs<sub>2</sub>HfCl<sub>6</sub>: Te ( $\lambda_{\text{ex}}=254$  nm,  $\lambda_{\text{em}}=456$  nm).

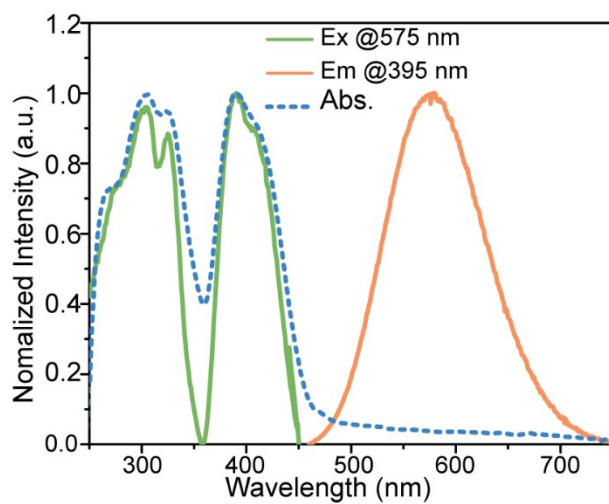

**Figure S5.** Normalized absorption, excitation and emission spectra of CHC.

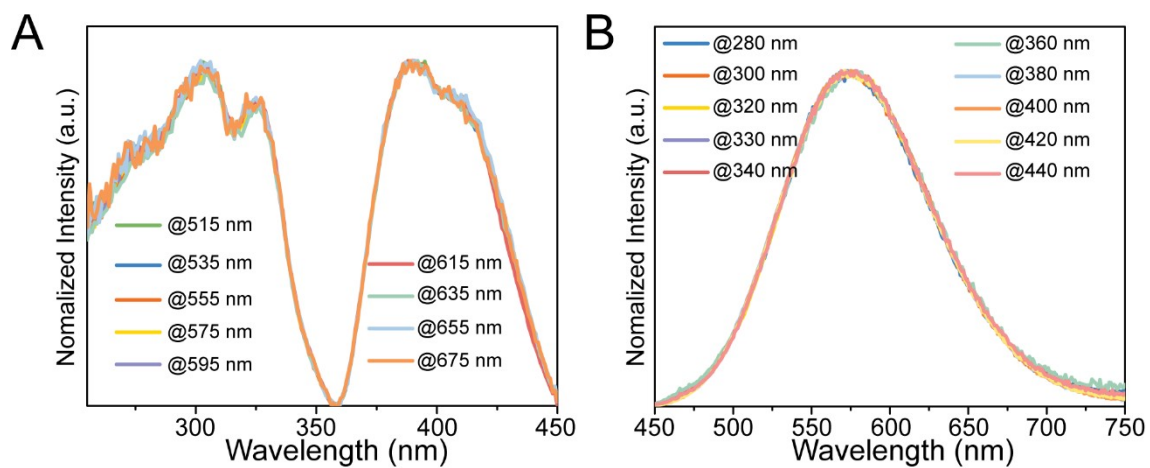

**Figure S6.** A) Normalized excitation spectra monitored at different emission wavelengths. B) Normalized emission spectra upon different excitation wavelengths.

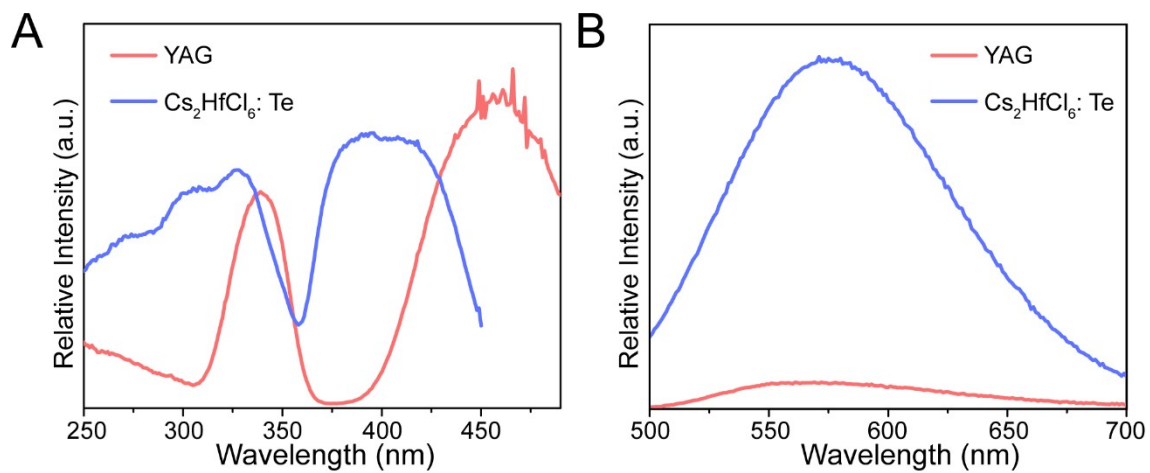

**Figure S7. A)** Excitation spectra of the commercial phosphors YAG and the as-prepared Cs<sub>2</sub>HfCl<sub>6</sub>: Te yellow phosphors monitored at 575 nm. **B)** Emission spectra of the commercial phosphors YAG and the as-prepared Cs<sub>2</sub>HfCl<sub>6</sub>: Te yellow phosphors upon 395 nm.



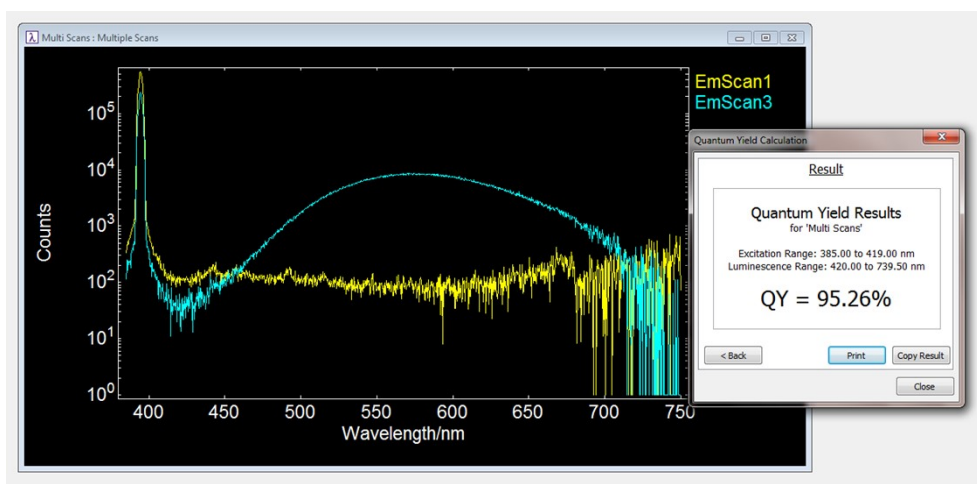

**Figure S8.** The PLQY of  $\text{Cs}_2\text{HfCl}_6: 0.5\% \text{Te}$ .

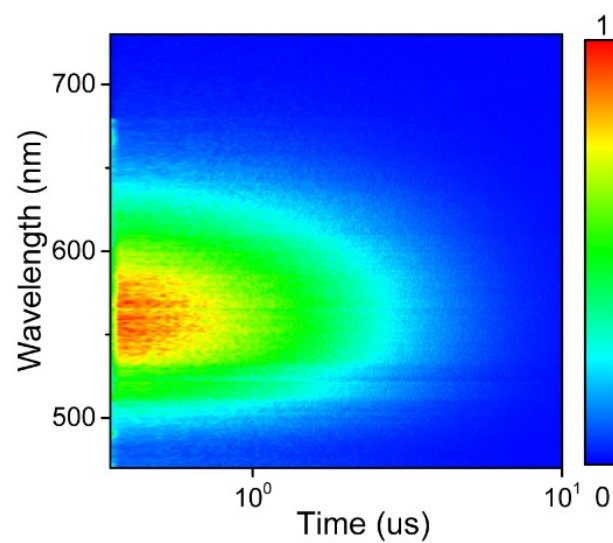

**Figure S9.** Pseudocolor map of Cs<sub>2</sub>HfCl<sub>6</sub>:Te nanosecond transient emission spectra excited by 395 nm.

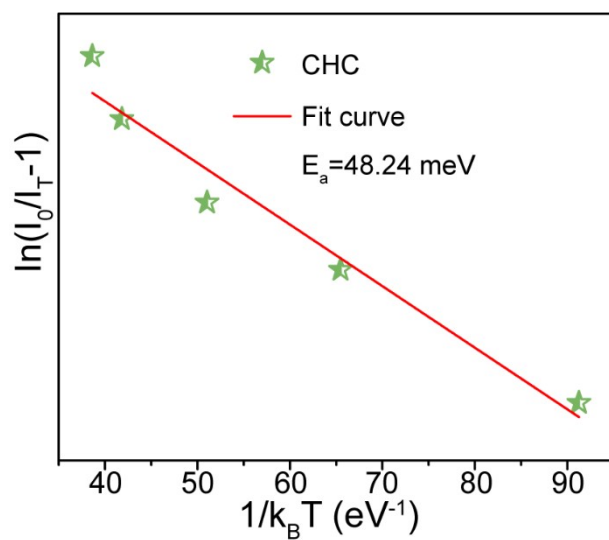

**Figure S10.** The relationships between  $\ln(I_0/I_T - 1)$  versus  $1/k_B T$  ( $T=77-300$  K) and the linear fitting result.

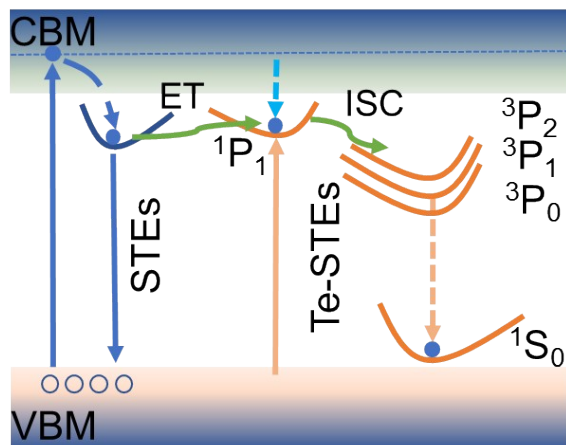

**Figure S11.** Energy level diagram for the photoluminescence process.

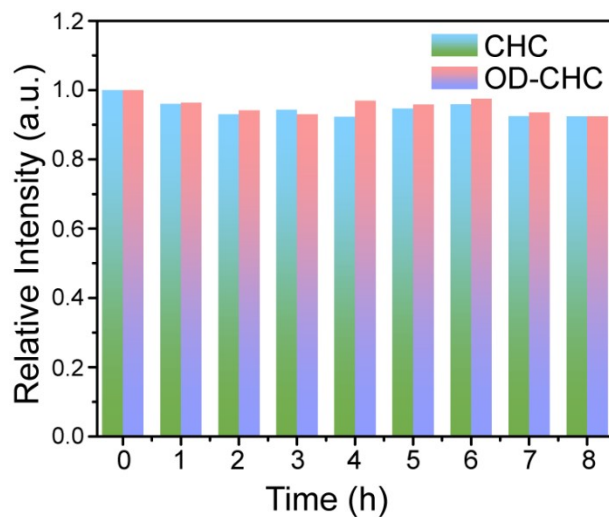

**Figure S12.** The normalized PL intensity between CHC and OD-CHC with UV (254nm, 36W) irradiation in ambient atmosphere at room temperature for different times.
